# Supplementary material for: The rhizosphere microbiome of burned holm-oak: potential role of the genus Arthrobacter in the recovery of burned soils
Source: PubMed Central journal article supplement (PMC5519729; doi:10.1038/s41598-017-06112-3), 2017-07-20
Supplement: 41598_2017_6112_MOESM1_ESM.pdf [file 41598_2017_6112_MOESM1_ESM.pdf]

## Supplementary Information

### The rhizosphere microbiome of burned holm-oak: potential role of the genus

#### *Arthrobacter* in the recovery of burned soils.

Antonio J. Fernández-González, Pilar Martínez-Hidalgo, José F. Cobo-Díaz, Pablo J. Villadas, Eustoquio Martínez-Molina, Nicolás Toro, Susannah G. Tringe, Manuel Fernández-López\*

**Table S1.** Physicochemical properties of sampled soils. EC: Electrical Conductivity. UOF: Undisturbed oak forest; BOF: Burned oak forest.

| Soil Variables           | Samples |        |
|--------------------------|---------|--------|
|                          | UOF     | BOF    |
| Clay (%)                 | 21.00   | 20.50  |
| Sand (%)                 | 45.74   | 49.54  |
| Silt (%)                 | 33.26   | 29.96  |
| Textural class           | Loam    | Loam   |
| pH (H <sub>2</sub> O)    | 6.1     | 7.6    |
| pH (KCl)                 | 5.7     | 7.0    |
| Available water (%)      | 17.11   | 16.43  |
| EC (mS/cm <sup>3</sup> ) | 0.140   | 0.220  |
| Organic matter (%)       | 7.61    | 4.54   |
| Total N (%)              | 0.366   | 0.233  |
| C/N                      | 11.95   | 11.19  |
| Available P (mg/Kg)      | 8.0     | 5.2    |
| K (mg/Kg)                | 445     | 330    |
| Na (mg/Kg)               | 0.065   | 0.065  |
| Mg (mg/Kg)               | 4.363   | 7.203  |
| Ca (%)                   | 12.650  | 17.972 |
| Fe (mg/Kg)               | 122     | 42     |

## **Determination of soil parameters.**

Texture of soil samples was measured by Bouyoucos hydrometer method (Bouyoucos, 1962). Potentiometric method (Willard et al., 1974; Bates, 1983) was used for the determination of pH. Available water measurement was carried out by gravimetry after drying at a maximum temperature of 105 °C (Gardner, 1986). The method of electrical conductivity was used for determine the salinity. Quantification of total organic carbon was made by volumetric techniques with wet oxidation at controlled temperature (Mebius, 1960). Total nitrogen determination was performed with the Kjeldahl method (Bremner, 1965). Soluble P was measured by Bray method (Bray and Kurtz, 1945), and quantification is performed by colorimetry. Determination exchangeable bases soil was made by spectrometry using ammonium acetate.

Bates, RG. Determination of pH, Wiley, New York. (1983).

Bouyoucos, GS. Hydrometer method improved for making particle size analysis of soils. *Agron. J.* **54**, 464-465 (1962).

Bray, RH and Kurtz, LT. Determination of total, organic and available form of phosphorus in soil. *Soil Sci.* **59**, 360-361 (1945).

Bremner, JM. Inorganic forms of nitrogen. p. 1179-1237. In C.A. Black et al. (ed.) *Methods of soil analysis. Part 2. Agron. Monogr. 9.* ASA, Madison, WI (1965).

Gardner WH. Water content. In *Methods of Soil Analysis, Part 1*, Klute ed. Am. Soc. Agronomy, Soil Sci. Soc. Am., pp. 493-544 (1986).

Mebius LJ. A rapid method for the determination of organic carbon in soil. *Anal. Chem. Acta* **22**, 120-124 (1960).

Willard HH, Merrit LL, Dean JA. *Instrumental methods of analysis.* 5th edition Van Nostrand. (1974).

**Table S2.** Bacterial OTUs phylotype and phylogenetic diversity across samples. Diversity indices were calculated using random selections of 4,631 sequences per soil sample or 13,893 sequences on samples average. Values in parenthesis are 95 % confidence intervals as calculated using MOTHUR. UOF: Undisturbed oak forest; BOF: Burned oak forest. Diversity t test was performed for the burned sample with its control (\* significant differences,  $p < 0.05$ ).

| Variables            | Samples             |                     |                     |                |                     |                     |                     |                |
|----------------------|---------------------|---------------------|---------------------|----------------|---------------------|---------------------|---------------------|----------------|
|                      | UOF1                | UOF2                | UOF3                | UOF<br>Average | BOF1                | BOF2                | BOF3                | BOF<br>Average |
| Raw reads            | 20718               | 19126               | 16776               | 56620          | 26320               | 17975               | 17777               | 62072          |
| Trimmed reads        | 4631                | 5071                | 4692                | 14394          | 10186               | 6544                | 5640                | 22370          |
| Normalized Sequences | 4631                | 4631                | 4631                | 13893          | 4631                | 4631                | 4631                | 13893          |
| OTUs                 | 934                 | 1026                | 973                 | 977,54±26,58   | 857                 | 926                 | 866                 | 883±21,53      |
| Chao1                | 1245<br>(1170;1343) | 1327<br>(1258;1417) | 1192<br>(1137;1265) | 1255±39,27     | 1377<br>(1259;1529) | 1403<br>(1298;1537) | 1166<br>(1095;1259) | 1315±75,04     |
| InvSimpson           | 140 (130;152)       | 200 (185;218)       | 204 (187;226)       | 181.33±20.70   | 20 (19;22)          | 34 (31;37)          | 20 (18;21)          | 24.67±4.67     |
| Shannon              | 5.89<br>(5.85;5.94) | 6.12<br>(6.08;6.16) | 6.15<br>(6.11;6.18) | 6.05±0.08      | 4.93<br>(4.86;5.00) | 5.28<br>(5.22;5.34) | 4.99<br>(4.92;5.06) | 5.07±0.11      |
| Pielou               | 0.86                | 0.88                | 0.89                | 0.88±0.01      | 0.73                | 0.77                | 0.74                | 0.75±0.01      |
| PhyloDiversity       | 94.89               | 99.86               | 96.88               | 97.21±1.44     | 113.76              | 99.46               | 84.21               | 99.14±8.53     |
| Coverage             | 92.49               | 91.73               | 93.29               | 92.50±0.45     | 90.98               | 90.53               | 92.33               | 91.28±0.54     |

**Table S3.** Relative abundances of phyla classified with RDP-II taxonomy across both soils and the soils separated by different treatments (values represent % of total sequences). UOF: Undisturbed oak forest; BOF: Burned oak forest.

| Taxon                              | Both  | UOF   | BOF   |
|------------------------------------|-------|-------|-------|
| <i>Actinobacteria</i>              | 44.19 | 33.85 | 54.53 |
| <i>Alphaproteobacteria</i>         | 15.49 | 18.90 | 12.09 |
| <i>Betaproteobacteria</i>          | 7.62  | 7.60  | 7.63  |
| <i>Acidobacteria</i>               | 7.50  | 10.88 | 4.12  |
| <i>Bacteroidetes</i>               | 3.60  | 3.45  | 3.74  |
| <i>Gammaproteobacteria</i>         | 3.44  | 5.62  | 1.25  |
| <i>Planctomycetes</i>              | 2.36  | 2.89  | 1.84  |
| <i>Gemmatimonadetes</i>            | 1.56  | 0.99  | 2.14  |
| <i>Verrucomicrobia</i>             | 1.31  | 1.79  | 0.83  |
| <i>Deltaproteobacteria</i>         | 1.17  | 1.30  | 1.04  |
| Unclassified <i>Proteobacteria</i> | 1.17  | 1.73  | 0.61  |
| <i>Firmicutes</i>                  | 1.15  | 0.39  | 1.91  |
| <i>Chloroflexi</i>                 | 0.78  | 0.93  | 0.63  |
| Candidate_division_WPS-2           | 0.36  | 0.30  | 0.43  |
| Candidate_division_WPS-1           | 0.33  | 0.32  | 0.34  |
| Candidatus_Saccharibacteria        | 0.32  | 0.47  | 0.17  |
| <i>Armatimonadetes</i>             | 0.24  | 0.19  | 0.29  |
| <i>Chlamydiae</i>                  | 0.06  | 0.08  | 0.04  |
| <i>Nitrospirae</i>                 | 0.04  | 0.04  | 0.04  |
| <i>Ignavibacteriae</i>             | 0.03  | 0.06  | 0.00  |
| <i>Thaumarchaeota</i>              | 0.02  | 0.04  | 0.00  |
| <i>BRC1</i>                        | 0.01  | 0.01  | 0.00  |
| <i>Hydrogenedentes</i>             | 0.01  | 0.01  | 0.00  |
| Unclassified                       | 7.24  | 6.33  | 8.15  |

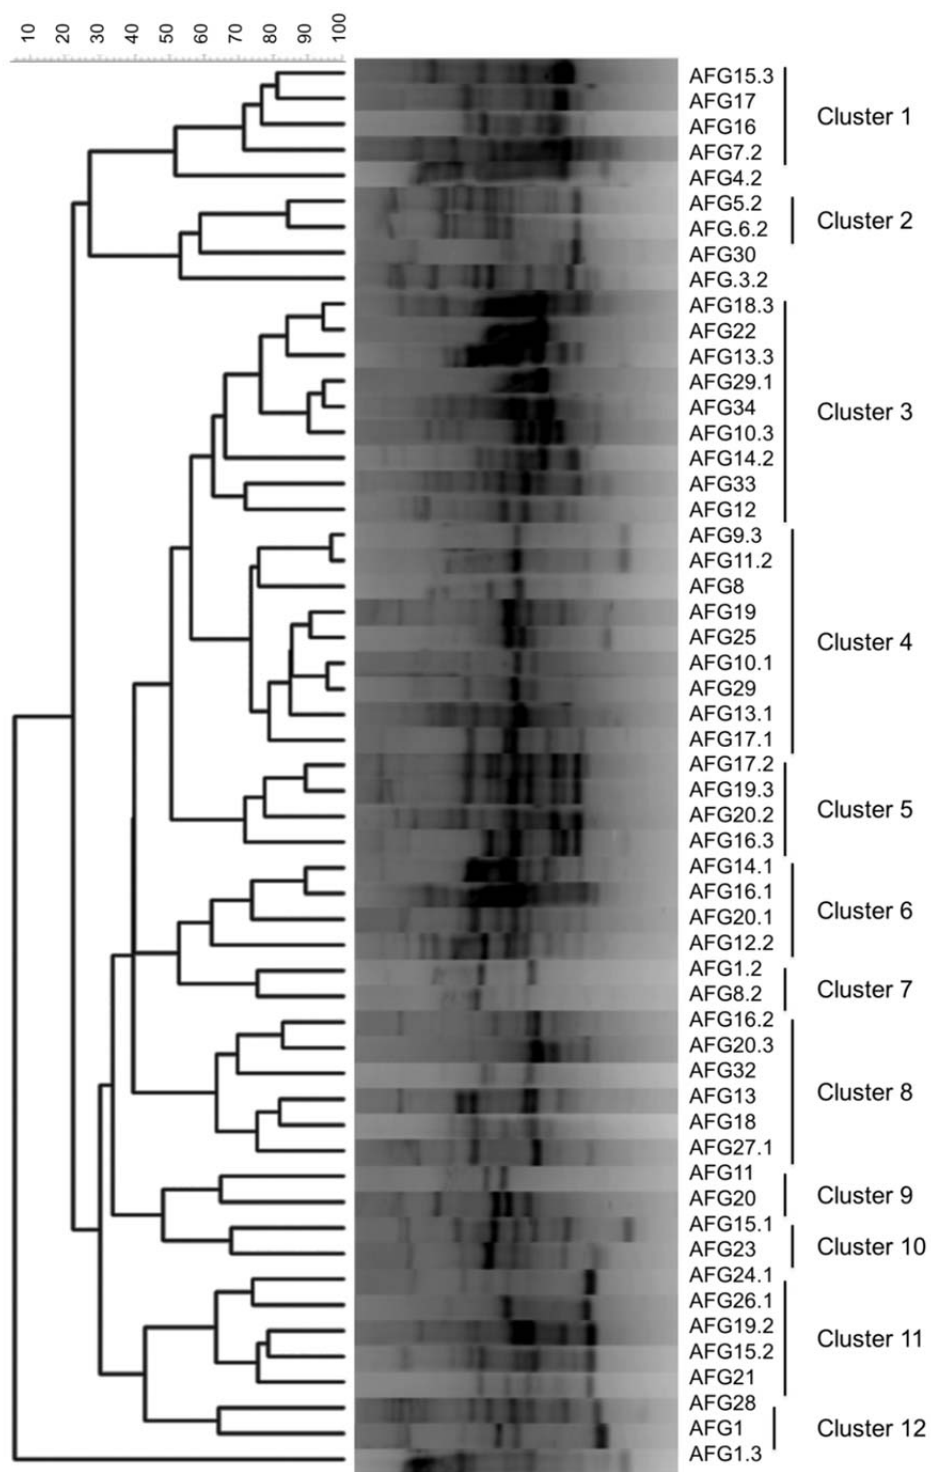

**Figure S1.** Dendrogram showing genetic relatedness of 55 *Arthrobacter* strains isolated from burned oak forest soil determined by analysis of RAPD fingerprints using the Pearson's coefficient and UPGMA cluster methods.

**Table S4.** 16S rDNA gene analysis of strains isolated from burned oak forest (BOF) soil used in this study.

| Isolate ID | RAPD group | Accession | Most similar <i>Arthrobacter</i> type strain | Accession | Similarity % |
|------------|------------|-----------|----------------------------------------------|-----------|--------------|
| AFG4.2     | NG         | KT314131  | <i>A. aurescens</i> DSM 20116 <sup>T</sup>   | X83405    | 99.49        |
| AFG9.3     | G-4        | KT314144  | <i>A. aurescens</i> DSM 20116 <sup>T</sup>   | X83405    | 99.86        |
| AFG11.2    | G-4        | KT314132  | <i>A. aurescens</i> DSM 20116 <sup>T</sup>   | X83405    | 99.86        |
| AFG1.2     | G-7        | KT314129  | <i>A. globiformis</i> JCM 1332 <sup>T</sup>  | NR_112192 | 99.71        |
| AFG8.2     | G-7        | KT314153  | <i>A. globiformis</i> JCM 1332 <sup>T</sup>  | NR_112192 | 99.57        |
| AFG11      | G-9        | KT314104  | <i>A. globiformis</i> JCM 1332 <sup>T</sup>  | NR_112192 | 99.57        |
| AFG12.2    | G-6        | KT314155  | <i>A. globiformis</i> JCM 1332 <sup>T</sup>  | NR_112192 | 99.64        |
| AFG13      | G-8        | KT314106  | <i>A. globiformis</i> JCM 1332 <sup>T</sup>  | NR_112192 | 99.57        |
| AFG14.1    | G-6        | KT314146  | <i>A. globiformis</i> JCM 1332 <sup>T</sup>  | NR_112192 | 99.71        |
| AFG15.1    | G-10       | KT314156  | <i>A. globiformis</i> JCM 1332 <sup>T</sup>  | NR_112192 | 99.57        |
| AFG16.2    | G-8        | KT314149  | <i>A. globiformis</i> JCM 1332 <sup>T</sup>  | NR_112192 | 99.49        |
| AFG16.3    | G-5        | KT314148  | <i>A. globiformis</i> JCM 1332 <sup>T</sup>  | NR_112192 | 99.71        |
| AFG17.1    | G-4        | KT314145  | <i>A. globiformis</i> JCM 1332 <sup>T</sup>  | NR_112192 | 99.71        |
| AFG17.2    | G-5        | KT314152  | <i>A. globiformis</i> JCM 1332 <sup>T</sup>  | NR_112192 | 99.71        |
| AFG19      | G-4        | KT314110  | <i>A. globiformis</i> JCM 1332 <sup>T</sup>  | NR_112192 | 99.49        |
| AFG19.3    | G-5        | KT314147  | <i>A. globiformis</i> JCM 1332 <sup>T</sup>  | NR_112192 | 99.71        |
| AFG20      | G-9        | KT314111  | <i>A. globiformis</i> JCM 1332 <sup>T</sup>  | NR_112192 | 99.57        |
| AFG20.1    | G-6        | KT314142  | <i>A. globiformis</i> JCM 1332 <sup>T</sup>  | NR_112192 | 99.49        |
| AFG23      | G-10       | KT314114  | <i>A. globiformis</i> JCM 1332 <sup>T</sup>  | NR_112192 | 99.57        |
| AFG24.1    | G-11       | KT314138  | <i>A. globiformis</i> JCM 1332 <sup>T</sup>  | NR_112192 | 99.71        |
| AFG27.1    | G-8        | KT314139  | <i>A. globiformis</i> JCM 1332 <sup>T</sup>  | NR_112192 | 99.49        |
| AFG28      | G-12       | KT314116  | <i>A. globiformis</i> JCM 1332 <sup>T</sup>  | NR_112192 | 99.57        |
| AFG30      | NG         | KT314118  | <i>A. globiformis</i> JCM 1332 <sup>T</sup>  | NR_112192 | 99.71        |

|         |      |          |                                                 |           |       |
|---------|------|----------|-------------------------------------------------|-----------|-------|
| AFG12   | G-3  | KT314105 | <i>A. humicola</i> KV-653 <sup>T</sup>          | NR_041546 | 99.71 |
| AFG25   | G-4  | KT314115 | <i>A. humicola</i> KV-653 <sup>T</sup>          | NR_041546 | 99.93 |
| AFG18   | G-8  | KT314109 | <i>A. nicotinovorans</i> DSM 420 <sup>T</sup>   | NR_026194 | 99.35 |
| AFG1.3  | NG   | KT314125 | <i>A. nitroguajacolicus</i> G2-1 <sup>T</sup>   | NR_027199 | 99.56 |
| AFG8    | G-4  | KT314103 | <i>A. nitroguajacolicus</i> G2-1 <sup>T</sup>   | NR_027199 | 99.93 |
| AFG13.3 | G-3  | KT314154 | <i>A. nitroguajacolicus</i> G2-1 <sup>T</sup>   | NR_027199 | 99.93 |
| AFG16.1 | G-6  | KT314130 | <i>A. nitroguajacolicus</i> G2-1 <sup>T</sup>   | NR_027199 | 99.93 |
| AFG18.3 | G-3  | KT314140 | <i>A. nitroguajacolicus</i> G2-1 <sup>T</sup>   | NR_027199 | 99.93 |
| AFG22   | G-3  | KT314113 | <i>A. nitroguajacolicus</i> G2-1 <sup>T</sup>   | NR_027199 | 99.86 |
| AFG29.1 | G-3  | KT314141 | <i>A. nitroguajacolicus</i> G2-1 <sup>T</sup>   | NR_027199 | 99.86 |
| AFG1    | G-12 | KT314102 | <i>A. oryzae</i> KV-651 <sup>T</sup>            | NR_041545 | 99.64 |
| AFG10.1 | G-4  | KT314124 | <i>A. oxydans</i> DSM 20119 <sup>T</sup>        | NR_026236 | 99.13 |
| AFG15.3 | G-1  | KT314123 | <i>A. oxydans</i> DSM 20119 <sup>T</sup>        | NR_026236 | 99.20 |
| AFG19.2 | G-11 | KT314143 | <i>A. oxydans</i> DSM 20119 <sup>T</sup>        | NR_026236 | 99.20 |
| AFG20.2 | G-5  | KT314137 | <i>A. oxydans</i> DSM 20119 <sup>T</sup>        | NR_026236 | 99.20 |
| AFG29   | G-4  | KT314117 | <i>A. oxydans</i> DSM 20119 <sup>T</sup>        | NR_026236 | 99.20 |
| AFG14.2 | G-3  | KT314151 | <i>A. pascens</i> DSM 20545 <sup>T</sup>        | NR_026191 | 99.64 |
| AFG7.2  | G-1  | KT314127 | <i>A. phenanthrenivorans</i> Sphe3 <sup>T</sup> | NR_074770 | 99.42 |
| AFG10.3 | G-3  | KT314150 | <i>A. siccitolerans</i> 4J27 <sup>T</sup>       | NR_108849 | 99.57 |
| AFG13.1 | G-4  | KT314136 | <i>A. siccitolerans</i> 4J27 <sup>T</sup>       | NR_108849 | 99.64 |
| AFG15.2 | G-11 | KT314122 | <i>A. siccitolerans</i> 4J27 <sup>T</sup>       | NR_108849 | 99.93 |
| AFG17   | G-1  | KT314108 | <i>A. siccitolerans</i> 4J27 <sup>T</sup>       | NR_108849 | 99.49 |
| AFG20.3 | G-8  | KT314134 | <i>A. siccitolerans</i> 4J27 <sup>T</sup>       | NR_108849 | 99.49 |
| AFG26.1 | G-11 | KT314133 | <i>A. siccitolerans</i> 4J27 <sup>T</sup>       | NR_108849 | 99.57 |
| AFG33   | G-3  | KT314120 | <i>A. siccitolerans</i> 4J27 <sup>T</sup>       | NR_108849 | 99.64 |
| AFG34   | G-3  | KT314121 | <i>A. siccitolerans</i> 4J27 <sup>T</sup>       | NR_108849 | 99.13 |
| AFG16   | G-1  | KT314107 | <i>A. sulfonivorans</i> ALL <sup>T</sup>        | NR_025084 | 99.49 |

|        |      |          |                                            |           |       |
|--------|------|----------|--------------------------------------------|-----------|-------|
| AFG21  | G-11 | KT314112 | <i>A. sulfonivorans</i> ALL <sup>T</sup>   | NR_025084 | 98.99 |
| AFG32  | G-8  | KT314119 | <i>A. sulfonivorans</i> ALL <sup>T</sup>   | NR_025084 | 99.06 |
| AFG3.2 | NG   | KT314126 | <i>A. sulfureus</i> DSM 20167 <sup>T</sup> | NR_026237 | 99.28 |
| AFG5.2 | G-2  | KT314128 | <i>A. sulfureus</i> DSM 20167 <sup>T</sup> | NR_026237 | 99.49 |
| AFG6.2 | G-2  | KT314135 | <i>A. sulfureus</i> DSM 20167 <sup>T</sup> | NR_026237 | 99.49 |

---

16S rRNA gene sequence analysis: Alignment was performed using nucleotide BLAST algorithm against strain types from nr/nt database. Accession: refers to GenBank accession numbers. Similarity %: shows the percentage of identity to the best BLAST hit with 100 % alignment coverage to each isolate.



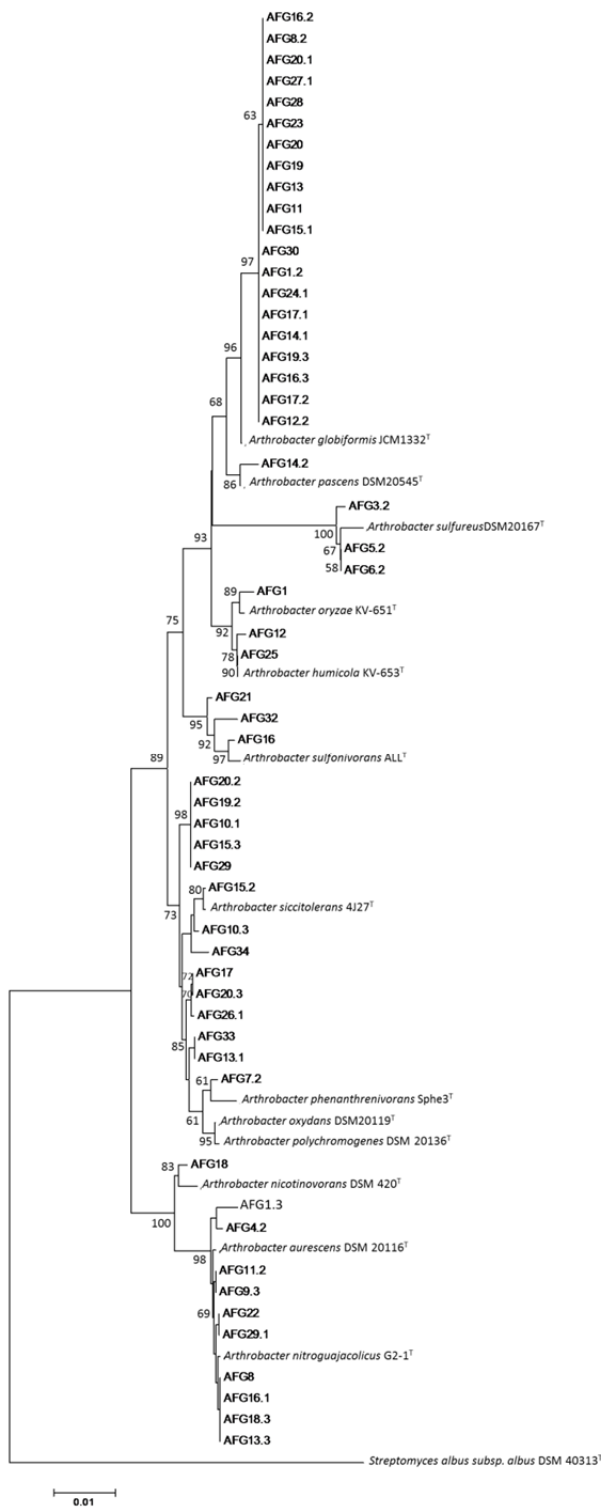

**Figure S2.** Neighbor-joining phylogenetic tree based on 16S rRNA gene sequences showing the relationship between the 55 isolated *Arthrobacter* strains and the closest recognized *Arthrobacter* species. Bar, 0.01 substitutions per nucleotide position. Bootstrap percentages (1000 replicates) above 50 % are shown at nodes.

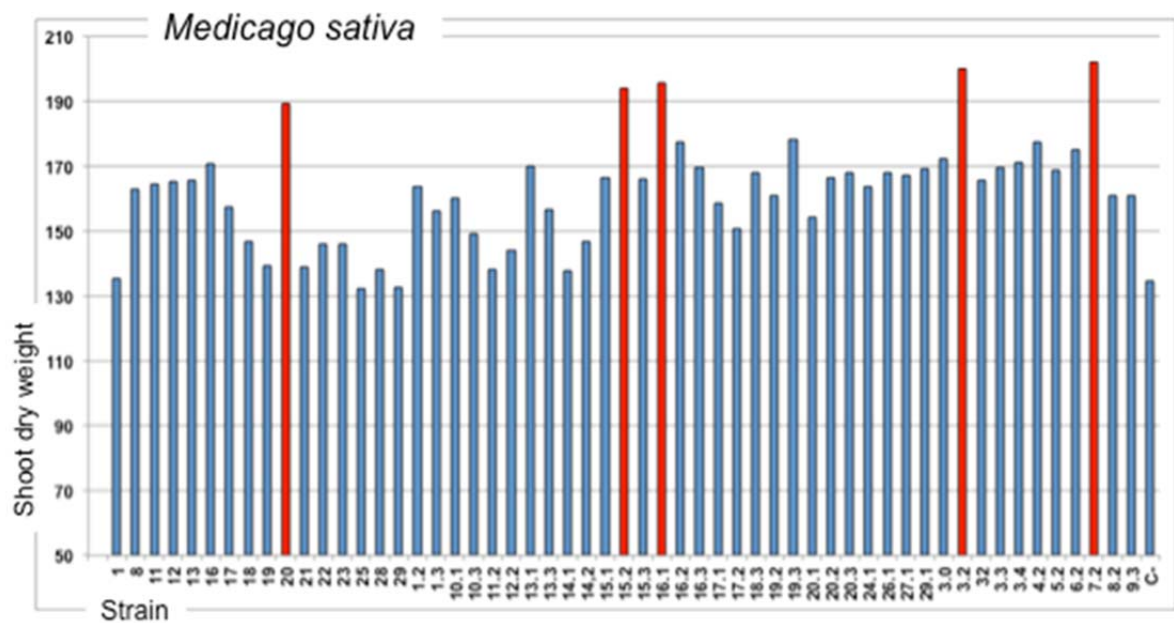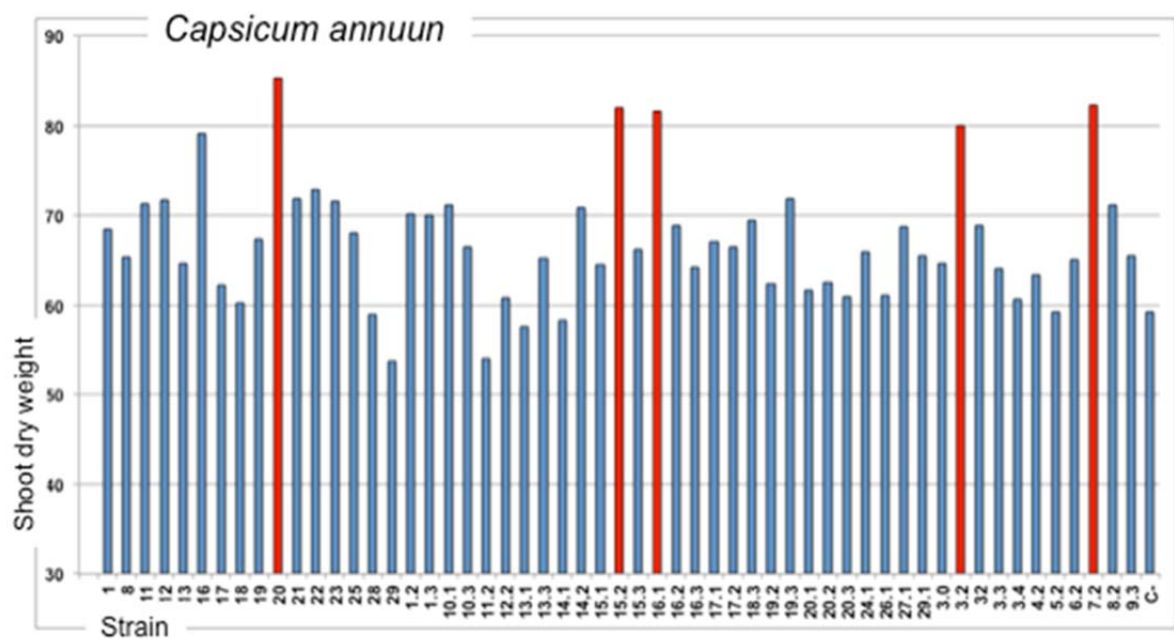

**Figure S3.** Means shoot dry weight of plants inoculated with the 55 *Arthrobacter* strains isolated from BOF soil. In red those *Arthrobacter* strains that showed significant ( $P < 0.05$ ) differences respect to the uninoculated controls when inoculated in alfalfa and pepper. Dry weights are expressed in mg.

A)

| Site | Altitude   | Orientation | Type of area                                    | Geographic coordinates    |
|------|------------|-------------|-------------------------------------------------|---------------------------|
| UOF  | 1790 m asl | South       | Undisturbed holm-oak forest                     | N 36°58'11'', W 3°27'37'' |
| BOF  | 1566 m asl | South       | Burned holm-oak forest, resprout after wildfire | N 36°57'26'', W 3°27'48'' |

B)

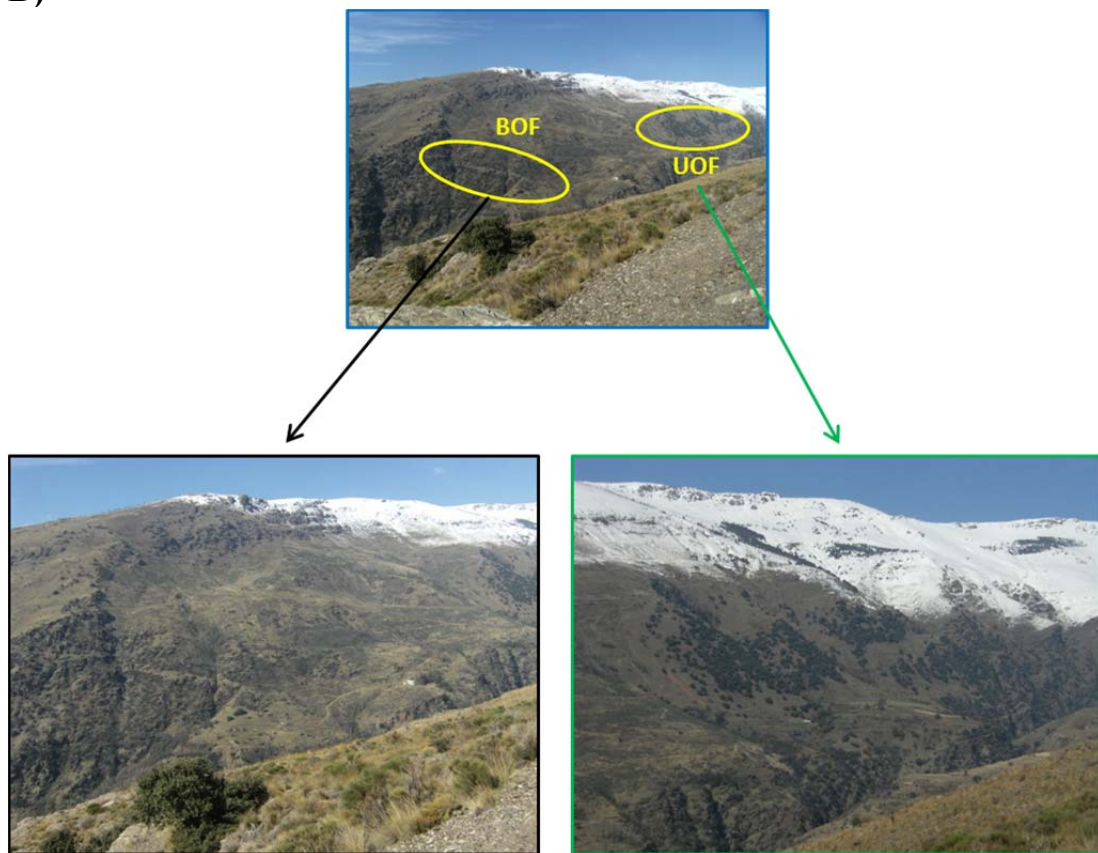

**Figure S4.** Description of the sampled areas. A) Location of study areas with its geographical coordinates, altitude and orientation. B) Situation of the sampled sites at Sierra Nevada national Park. UOF, undisturbed holm-oak forest; BOF, burned holm-oak forest. Photographs taken by M. Fernandez-Lopez on November 7<sup>th</sup>, 2008.
